# Supplementary material for: Targeting vasoactive intestinal peptide-mediated signaling enhances response to immune checkpoint therapy in pancreatic ductal adenocarcinoma
Source: PubMed Central journal article supplement (PMC9613684; doi:10.1038/s41467-022-34242-4), 2022-10-27
Supplement: 41467_2022_34242_MOESM1_ESM.pdf [file 41467_2022_34242_MOESM1_ESM.pdf]

## Supplementary Information

### Targeting vasoactive intestinal peptide-mediated signaling enhances response to immune checkpoint therapy in pancreatic ductal adenocarcinoma

#### Author list

Sruthi Ravindranathan<sup>1,2\*</sup>, Tenzin Passang<sup>1,2</sup>, Jian-Ming Li<sup>1,2</sup>, Shuhua Wang<sup>1,2</sup>, Rohan Dhamsania<sup>1,2</sup>, Michael Brandon Ware<sup>1,2</sup>, Mohammad Y. Zaidi<sup>1,2</sup>, Jingru Zhu<sup>1,2</sup>, Maria Cardenas<sup>3</sup>, Yuan Liu<sup>2,4</sup>, Sanjeev Gumber<sup>5,6</sup>, Brian Robinson<sup>5</sup>, Anish Sen-Majumdar<sup>7</sup>, Hanwen Zhang<sup>1</sup>, Shanmuganathan Chandrakasan<sup>8</sup>, Haydn Kissick<sup>2,3,9</sup>, Alan B. Frey<sup>7</sup>, Susan N. Thomas<sup>3,10,11</sup>, Bassel F. El-Rayes<sup>1,2</sup>, Gregory B. Lesinski<sup>1,2</sup>, Edmund K. Waller<sup>1,2\*</sup>.

#### Affiliations

<sup>1</sup>Department of Hematology and Medical Oncology, Emory University School of Medicine, Atlanta, GA, USA.

<sup>2</sup>Winship Cancer Institute, Emory University, Atlanta, GA, USA.

<sup>3</sup>Department of Urology, Emory University School of Medicine, Atlanta, GA, USA.

<sup>4</sup>Rollins School of Public Health, Emory University, Atlanta, GA, USA.

<sup>5</sup>Department of Pathology and Laboratory Medicine, Emory University School of Medicine, Atlanta, GA, USA.

<sup>6</sup>Yerkes National Primate Research Center, Emory University, Atlanta, GA, USA.

<sup>7</sup>Cambium Oncology LLC, Atlanta, GA, USA.

<sup>8</sup>Aflac Cancer and Blood Disorders Center, Emory University, Atlanta, GA, USA.

<sup>9</sup>Emory Vaccine Centre, Emory University, Atlanta, GA, USA.

<sup>10</sup>Woodruff School of Mechanical Engineering, Georgia Institute of Technology, Atlanta, GA, USA.

<sup>11</sup>Parker H. Petit Institute of Bioengineering and Bioscience, Georgia Institute of Technology, Atlanta, GA, USA.

#### Corresponding authors

\*To whom correspondence should be addressed:

[srra@outlook.com](mailto:srra@outlook.com) and [ewaller@emory.edu](mailto:ewaller@emory.edu)

**a**

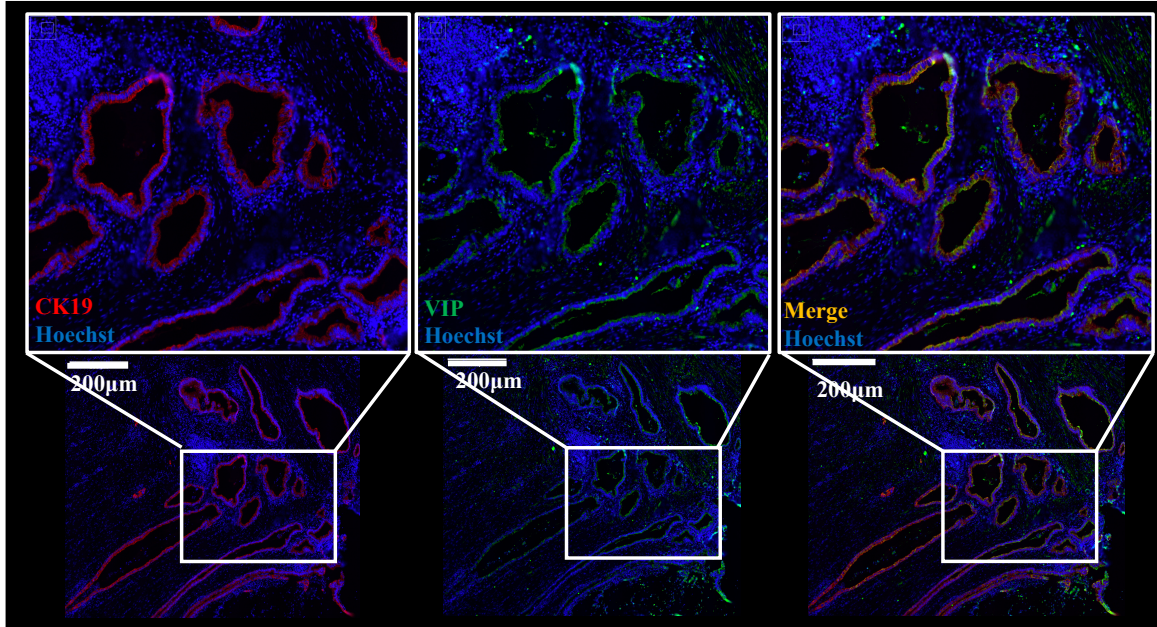

**b**

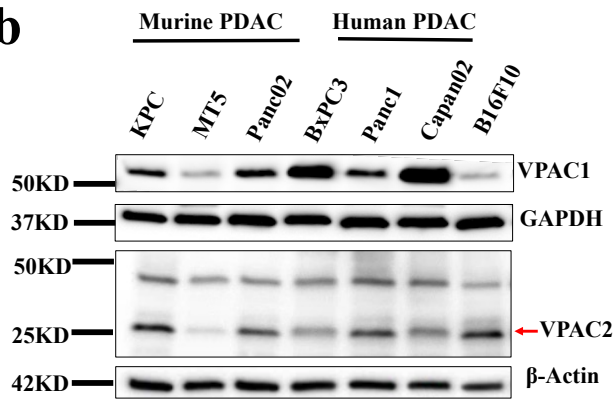

**c**

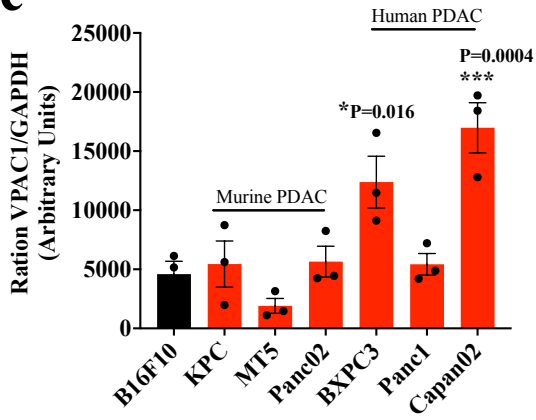

**d**

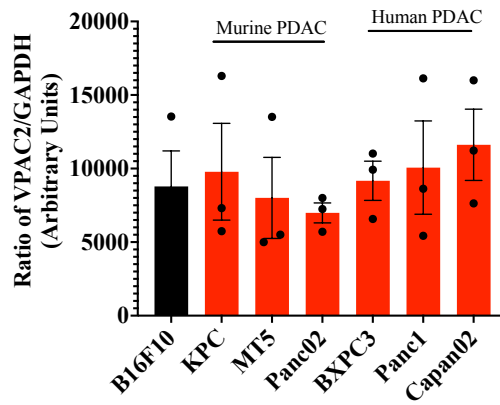

36 **Supplementary Fig. 1. PDAC cell lines and human PDAC tissues express VIP**  
37 **and receptors for VIP.** (a) Representative images of one human PDAC tumor  
38 stained with antibodies to VIP (green), CK19 (red), and merged (yellow) showing VIP  
39 expression in cancer epithelial cells. Scale bars represent 200 $\mu$ m. The experiment  
40 was performed once. (b) Representative western blot of lysates from murine  
41 melanoma; and murine and human PDAC cell lines probed for VPAC1, VPAC2, and  
42 GAPDH as control. The experiment was performed three independent times with  
43 similar results. (c) VPAC1, (d) VPAC2 protein bands from western blot were analyzed  
44 by densitometric analysis and normalized against the intensity of GAPDH. Results  
45 are the mean  $\pm$  SEM of three independent experiments. P values in c were  
46 determined by ANOVA followed by two-tailed Dunnett's post-test. \* $p < 0.05$ ,  
47 \*\*\* $p < 0.001$ .  
48  
49

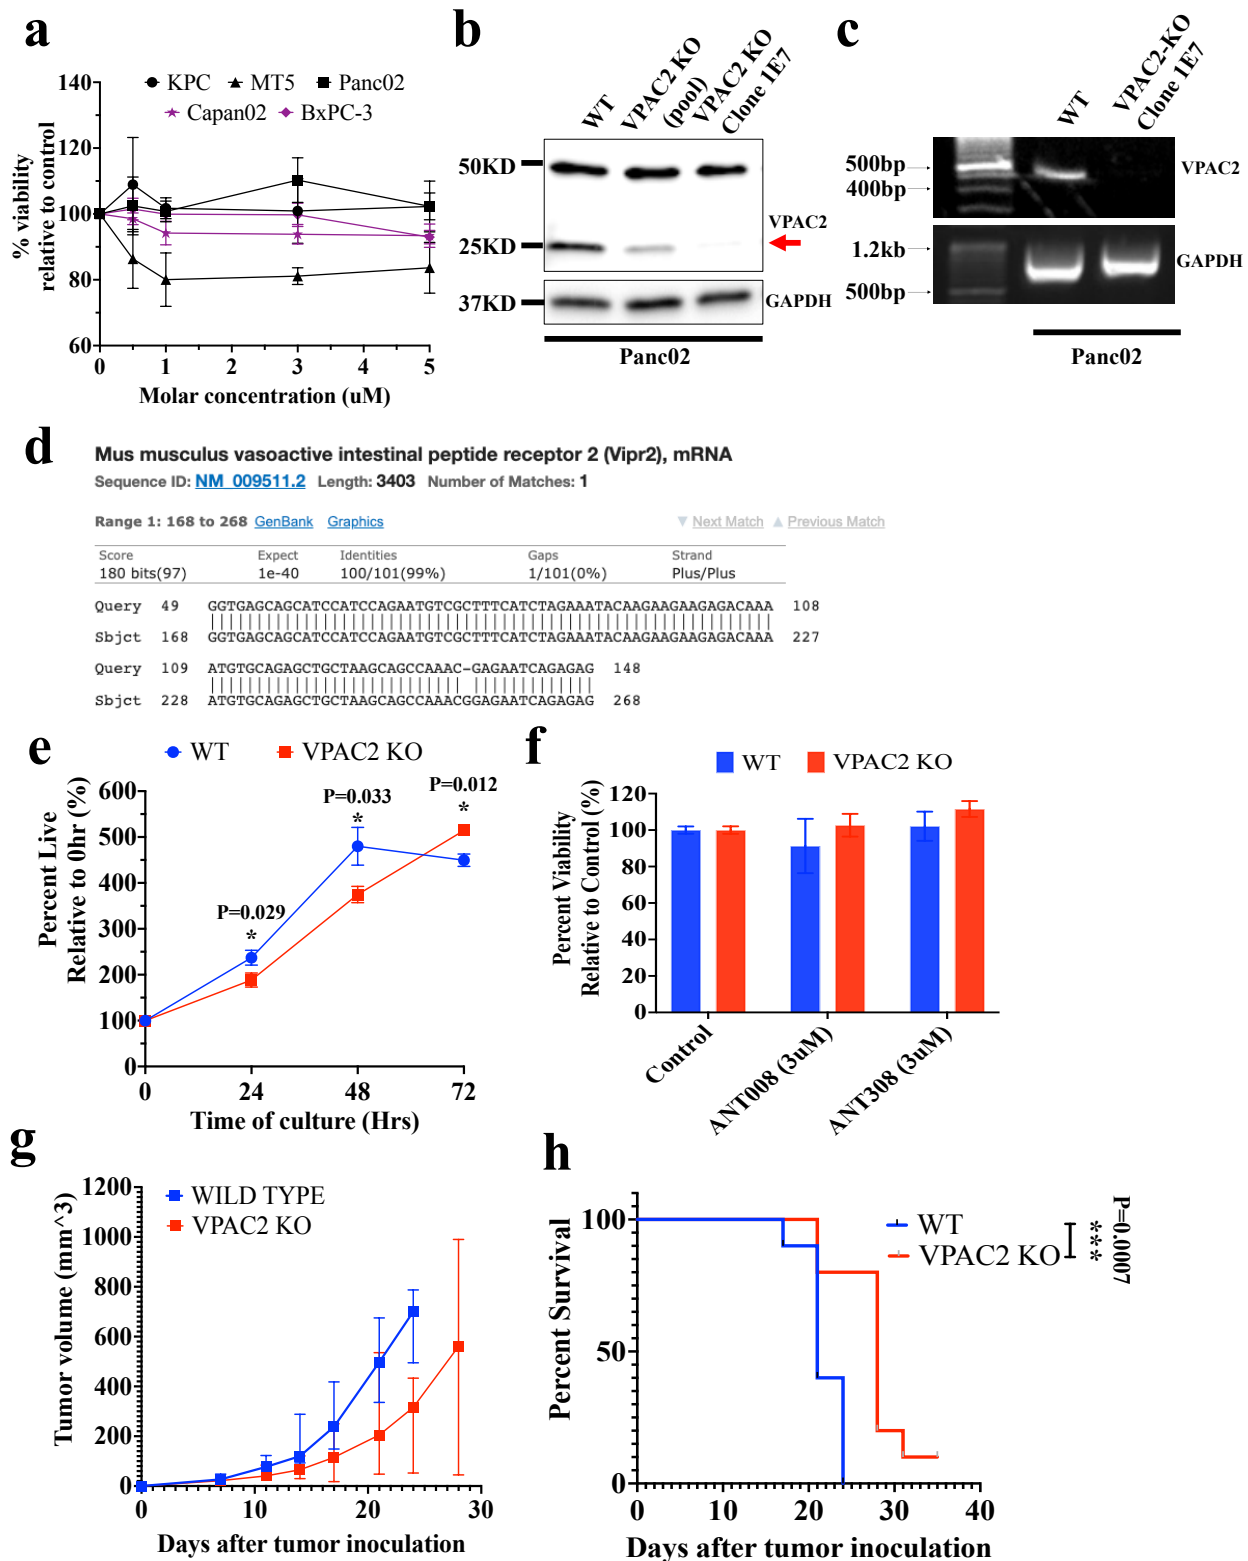

51

52

53

54

**Supplementary Fig. 2. Absence of VPAC2 receptor on PDAC cells confer limited autocrine effect on the growth of cancer cells *in vitro* and *in vivo*.** (a) Percentage viability of murine (MT5, KPC.Luc, Panc02) and human (Capan02, BxPC3) PDAC cell



55 lines cultured in the presence of different concentrations ranging from 0-5 $\mu$ M of  
56 ANT008 for 72 hours is plotted. Confirmation of CRISPR-Cas9 KO of *VIPR2* encoding  
57 VPAC2 receptor via (b) western blot; Experiment was performed before inoculating  
58 cells to mice (c) RT-PCR using primers targeting exon 9-12 downstream of the targeted  
59 site. The experiment was done three times with reproducible results; (d) Sanger  
60 Sequencing showing the validation of in-del mutation in exon 2. *In vitro* MTT assay  
61 showing (e) Proliferation of WT and KO cells over 72 hours; Statistical differences in e  
62 were calculated via two-tailed multiple unpaired t-tests with Welch correction. (f)  
63 Percent viability of wild type (WT) and VPAC2 KO (KO) Panc02 cells treated with  
64 ANT008 and ANT308 at 3 $\mu$ M for 72 hours. (g) Tumor growth curve of WT versus KO  
65 Panc02 cells in C57BL/6 mice following subcutaneous tumor implantation (n=10 per  
66 group). Values represent median tumor volume  $\pm$  95% confidence interval. (h) Kaplan-  
67 Meier survival plots corresponding to results in g. The median survival time for WT is  
68 21 days and 28 days for VPAC2 KO. Error bars represent mean and standard  
69 deviation. \*p<0.05, \*\*p<0.01.

70  
71  
72

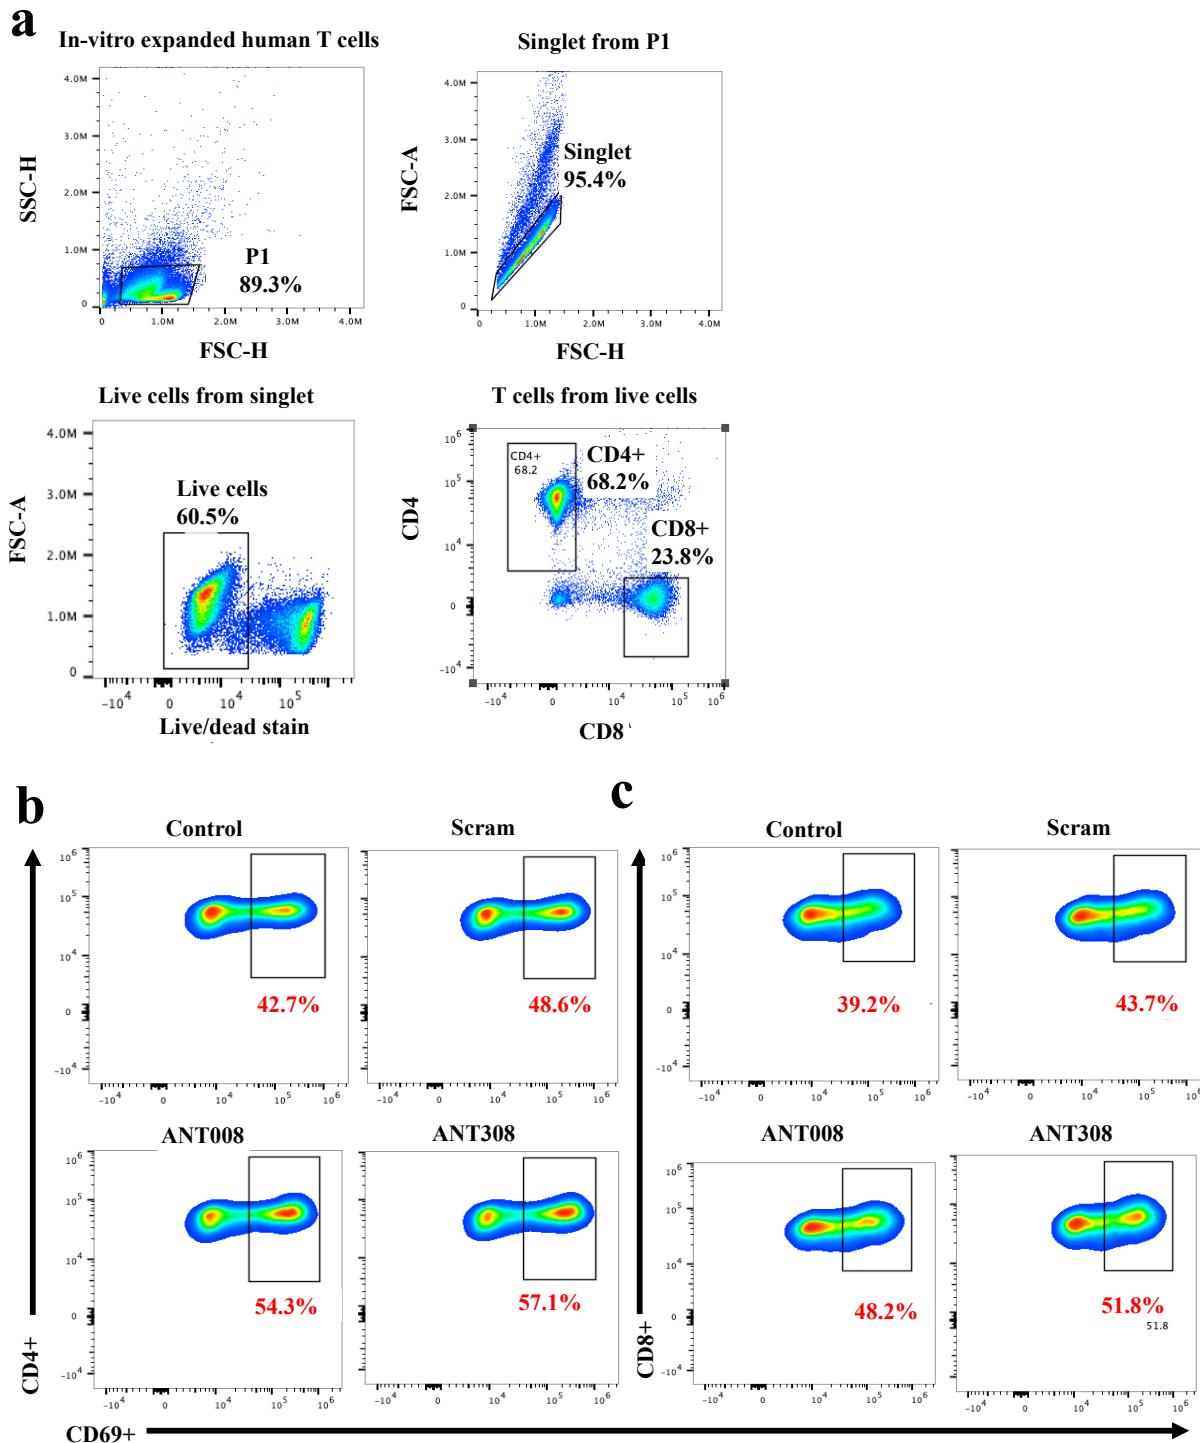

73  
 74 **Supplementary Fig. 3. Gating strategy for flow cytometric analysis of healthy**  
 75 **human T cells.** (a) Cells were gated as 'P1' by plotting forward scatter height (FSC-H)  
 76 and side scatter height (SSC-H). Singlet from P1 was selected by gating along the  
 77 diagonal on the forward scatter height (FSC-H) versus forward scatter area (FSC-A)

78 plot. Live cells from singlets were selected by plotting live/dead versus FSC-A. The live  
79 cells were then plotted on CD4 versus CD8 plot, to identify CD4+ and CD8+ T cells.  
80 CD69 expressing T cells in (b) CD4+ and (c) CD8+ subsets were then identified by  
81 plotting each subset on CD4/CD8 versus CD69 flow plots. The percentage of CD69+  
82 T cells within each subset is shown in red.  
83

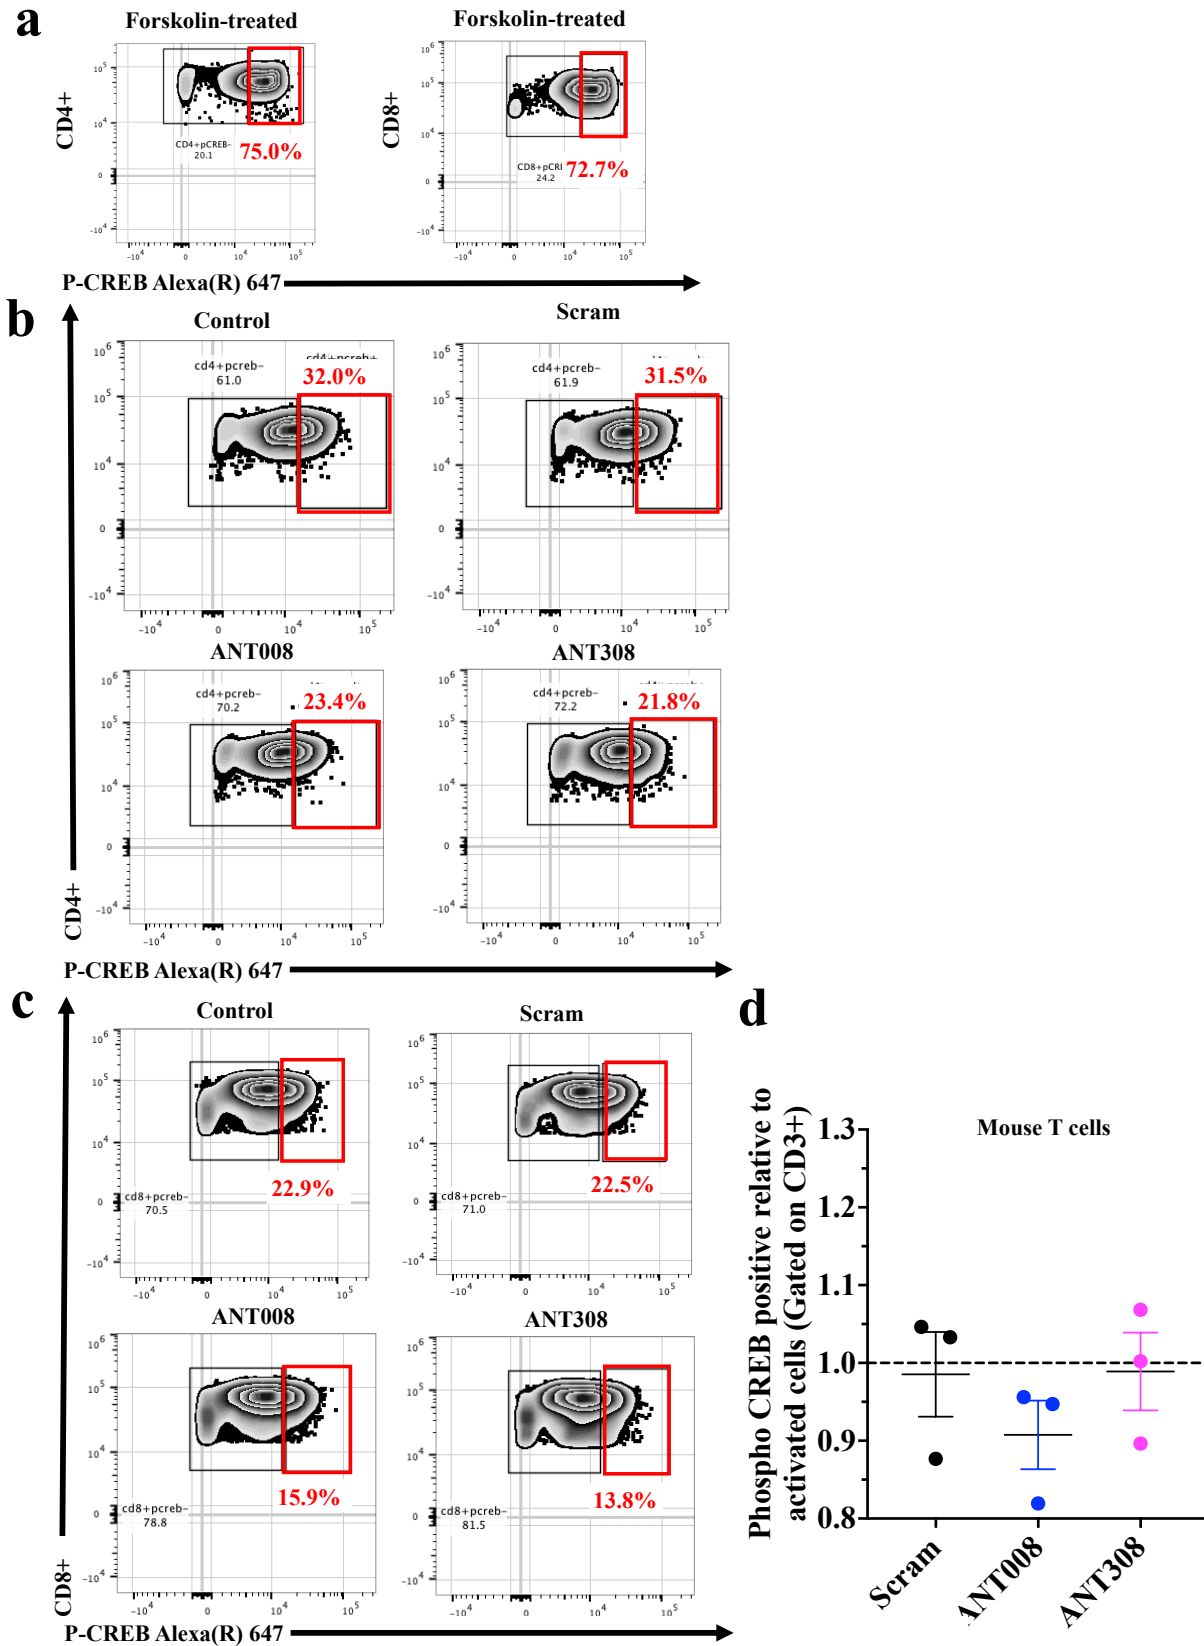

84  
85  
86  
87  
88

**Supplementary Fig. 4. Gating strategy for flow cytometric analysis of CREB phosphorylation in T cells.** (a) Plots for Forskolin-treated human T cells used as positive control for gating phospho-CREB positive cells. T cells were treated with

89 forskolin at 30 $\mu$ M on ice for 30 mins and stained for the surface expression of CD4 and  
90 CD8, followed by intracellular staining with anti-phospho-CREB (S133) antibody.  
91 Representative plots for phospho-CREB expression in (b) CD4+ and (c) CD8+ human  
92 T cells when treated with scrambled peptide (Scram), ANT008, and ANT308 at 3 $\mu$ M  
93 for 6h (d) Percentage of CD3+phospho-CREB+ in murine T cells under similar  
94 conditions as in c. Error bars show mean  $\pm$  SEM (n= 3 technical replicates).  
95

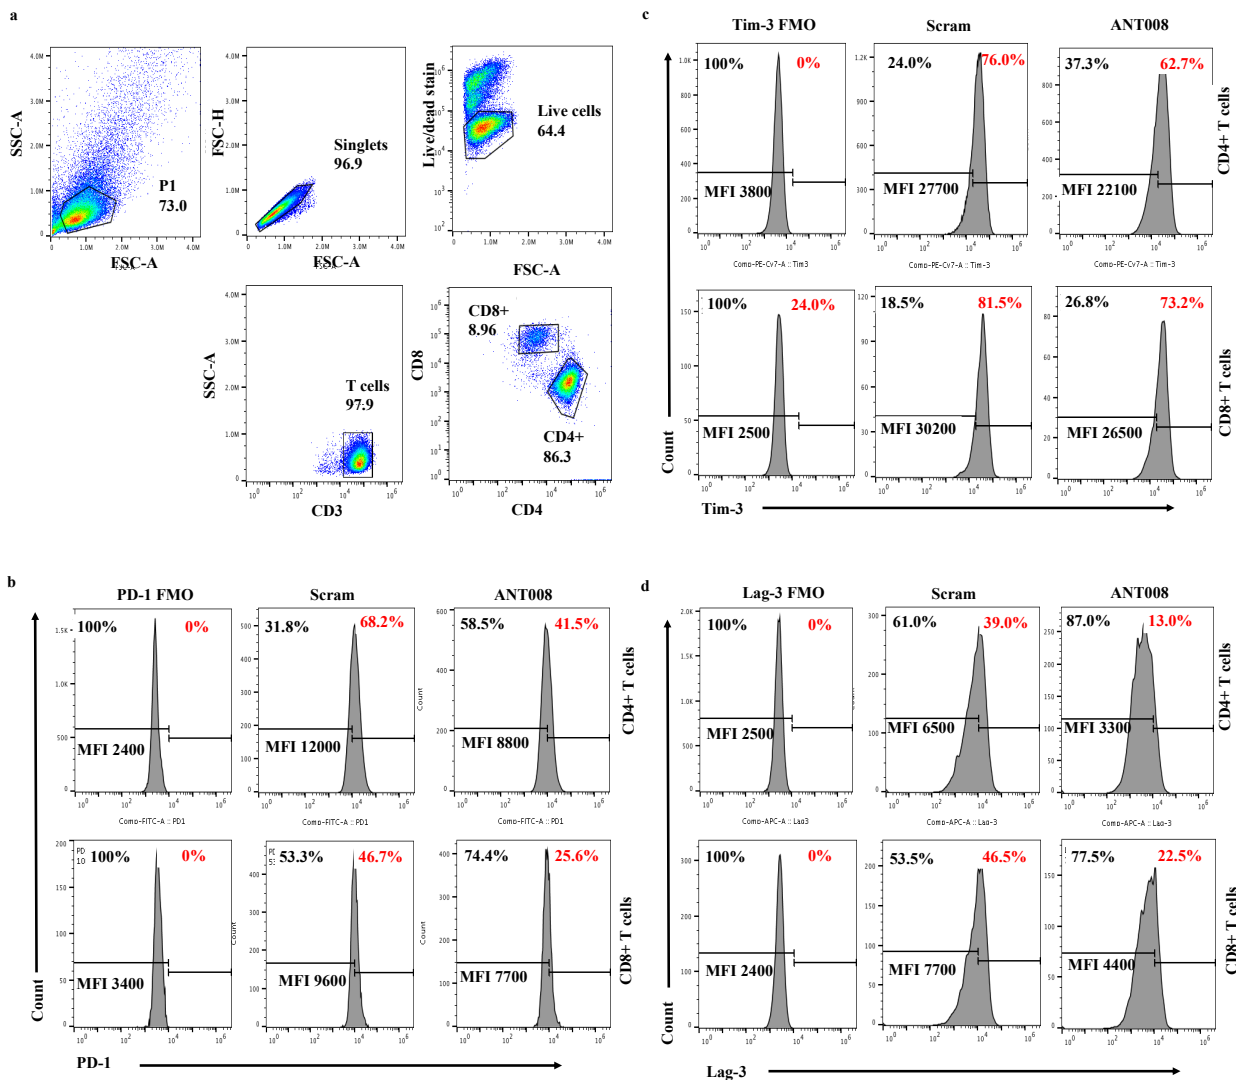

96  
 97  
 98 **Supplementary Fig. 5. Gating strategy for PD-1, Tim-3 or Lag-3 expression on**  
 99 **PDAC patient CD4+ or CD8+ T cells expanded ex-vivo over 9 days.** (a) Cells were  
 100 gated as 'P1' by plotting the forward scatter area (FSC-A) and side scatter area (SSC-  
 101 A). Singlet from P1 was selected by gating along the diagonal on the forward scatter  
 102 height (FSC-H) versus forward scatter area (FSC-A) plot. Live cells from singlets were  
 103 selected by plotting live/dead versus FSC-A. The live cells were then plotted on CD3  
 104 versus FSC-A plot, and the cells that are positive for CD3 were gated as T cells. CD4+  
 105 and CD8+ T cells were then discriminated by plotting T cells on CD4 versus CD8 plots.  
 106 (b) PD-1+, (c) Tim-3+ and (d) Lag-3+ cells were gated on CD4+ (top) or CD8+ (bottom)  
 107 T cells based on FMO controls.  
 108  
 109  
 110  
 111  
 112

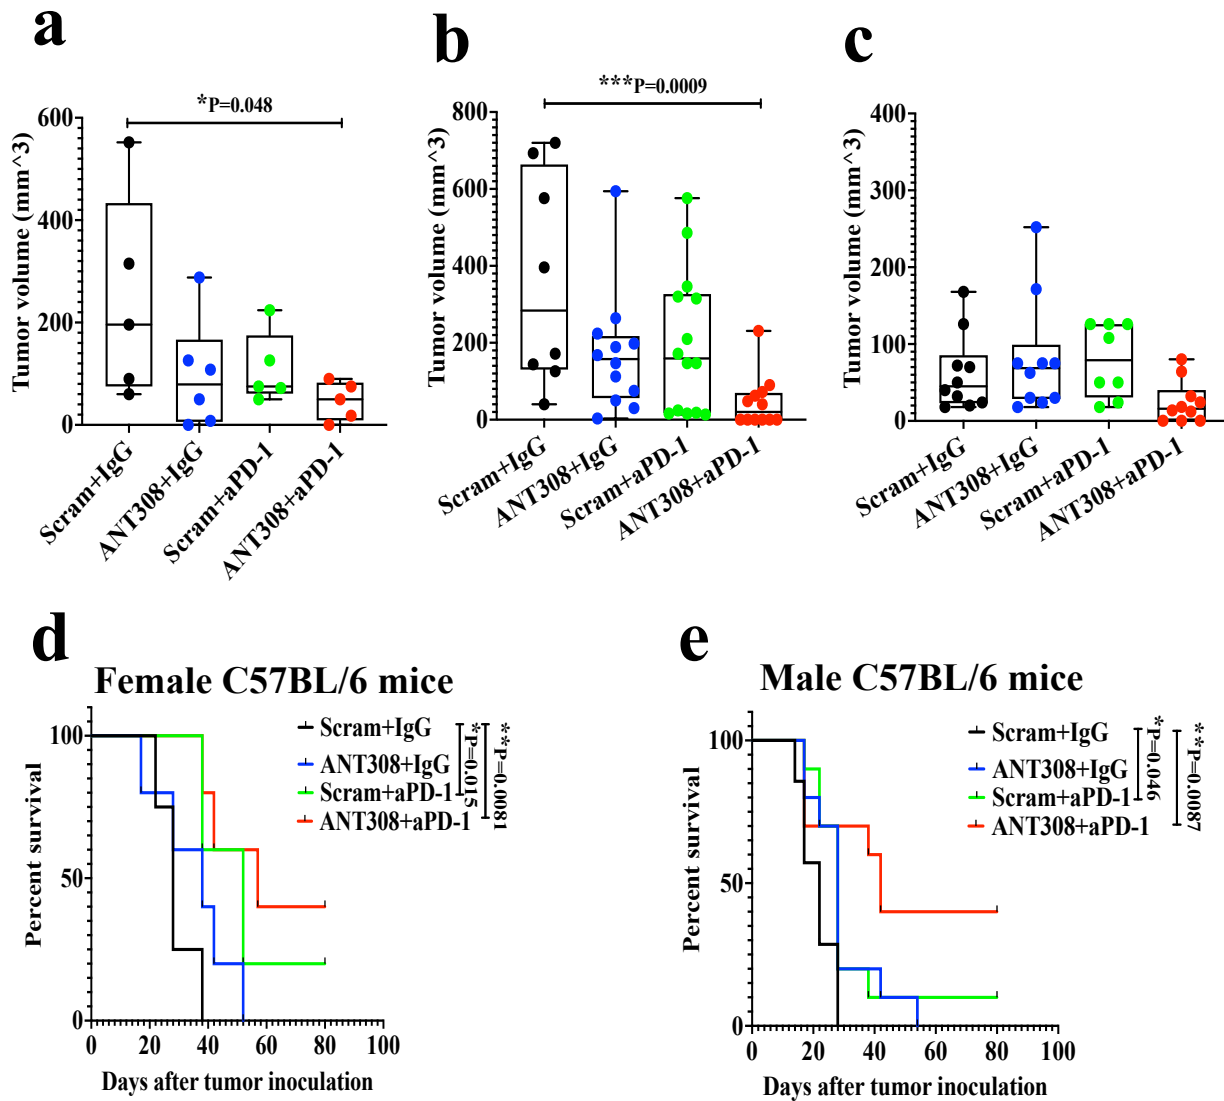

113

114 **Supplementary Fig. 6. Combination therapy with VIP-R antagonist and anti-PD-1**  
 115 **reduces tumor burden and improves survival in male and female C57BL/6 mice**  
 116 **with KPC tumors.** Boxplot showing tumor volumes of MT5 (a); KPC-Luc (b) and  
 117 Panc02 (c) tumor volumes as measured by Vernier calipers on day 22 for MT5 and day  
 118 22 for KPC and Panc02 after subcutaneous tumor implantation. Kaplan-Meier survival  
 119 curve of (d) female (n=5 per group) or (e) male (n=10 per group) C57BL/6 mice  
 120 subcutaneously implanted with KPC.Luc tumors and treated with ANT308 (female:  
 121 10µg, male: 20µg) and/or anti-PD-1. Statistical differences in a-c were calculated by  
 122 ANOVA followed by two-tailed Dunnett's post-test. The solid line shows the median  
 123 within each treatment group. Statistical differences in d and e are calculated via the  
 124 Log-rank test. \*p<0.05, \*\*p<0.01 and \*\*\*p<0.001.

125



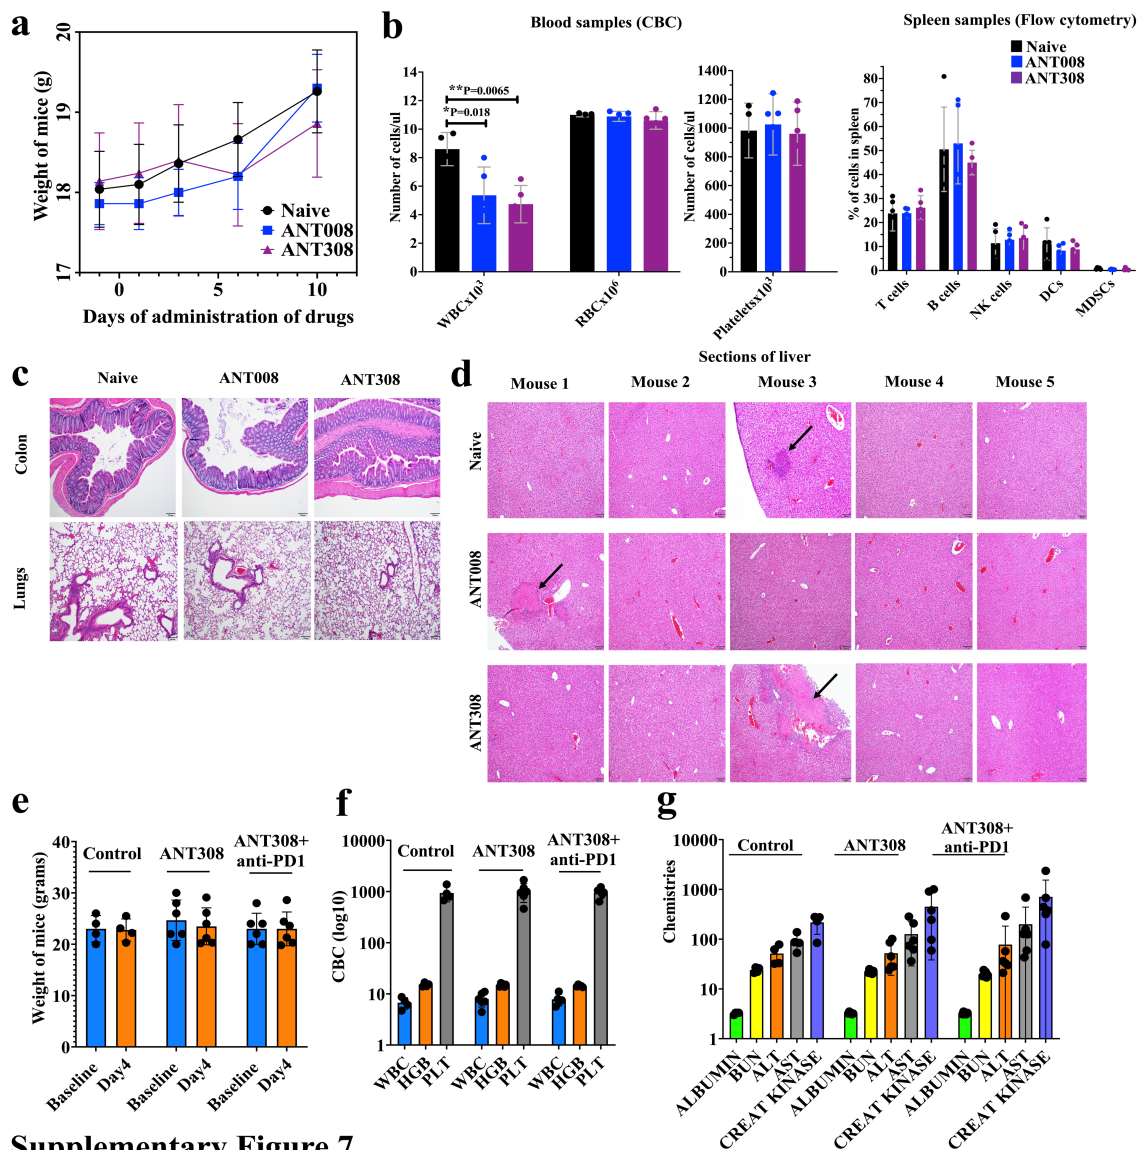

Supplementary Figure 7

126  
 127 **Supplementary Fig. 7. Administration of ANT008 or ANT308 showed no adverse**  
 128 **toxicity in C57BL/6 mice.** C57BL/6 mice received a daily subcutaneous injection of  
 129 ANT008 or ANT308 for 10 days (n=5 per group) and were analyzed for evidence of  
 130 toxicity on day 11. (a) Body weight in grams during the duration of drug administration;  
 131 (b) Number of WBCs, RBCs, and platelets in blood as per complete blood count (left)  
 132 proportions of T cells, B cells, NK cells, DCs and MDSCs in the spleen as identified by  
 133 flow cytometry (right) are plotted. Representative H&E-stained sections of (c) colon  
 134 (top), lungs (bottom), and (d) liver are shown. Arrows in D show focal hepatic lesions  
 135 in the liver. The focal hepatic necrosis that was observed in one of five mice in each  
 136 group is not considered drug-related toxicity, as these lesions are commonly observed  
 137 in several in-bred mice strains at the Jackson Laboratory [1, 2]. C57BL/6 mice received  
 138 daily subcutaneous injections of 30µg of ANT308 (n=6) or a combination of 30µg of  
 139 ANT308 daily along with 200µg of anti-PD1 every 3 days (n=6), for a duration of 4 days.  
 140 Mice receiving scrambled peptide and isotype IgG served as control (n=4). (e) Weight  
 141 of the mice, (f) complete blood count (CBC), and (g) serum chemistries after 4 days of  
 142 treatment are plotted. P values in b, e, f, and g were calculated by ANOVA followed by

143 Dunnett's post-test. Experiments on c and d were performed once with samples from  
144 multiple mice. *p*-values in **b** were calculated by ANOVA followed by two-tailed  
145 Dunnett's post-test. Error bars represent mean and standard deviation. \**p*<0.05,  
146 \*\**p*<0.01.

147  
148  
149  
150  
151  
152  
153  
154  
155  
156  
157

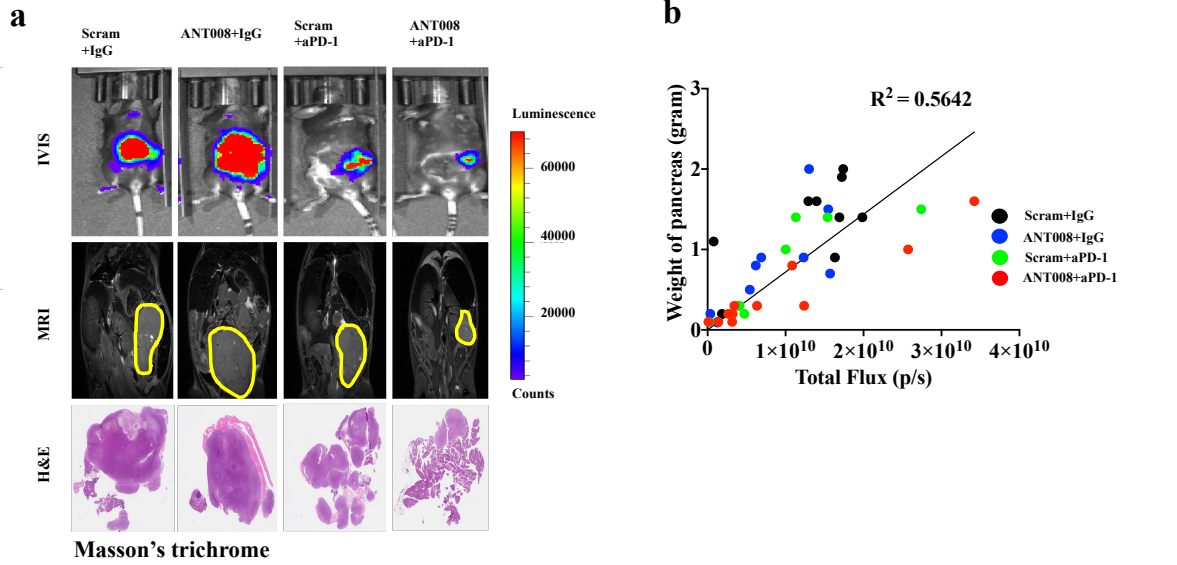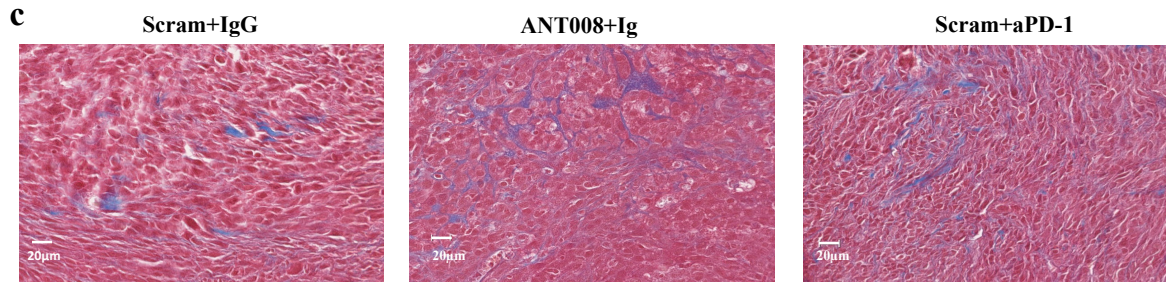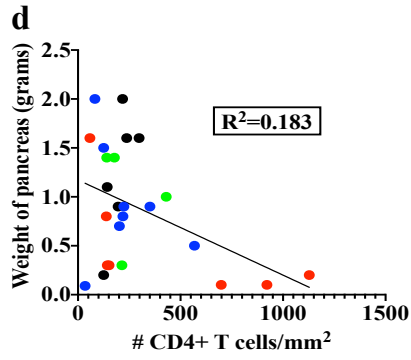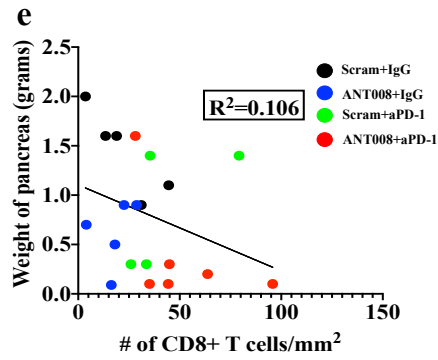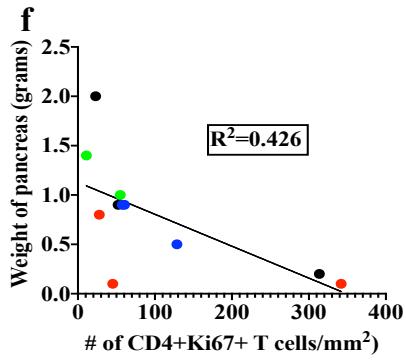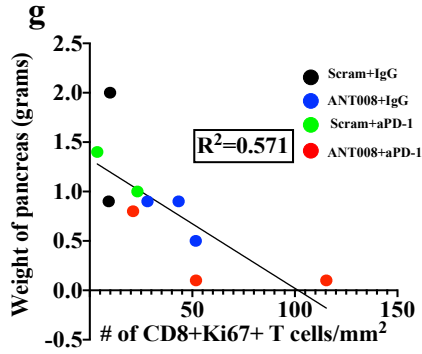

159  
160  
161  
162

163 **Supplementary Fig. 8. Bioluminescent signal from orthotopically implanted KPC-**  
164 **Luc tumors positively correlated with tumor burden and demonstrates histologic**  
165 **desmoplasia.** (a) On day 26 after orthotopic KPC-Luc tumor implantation in C57BL/6  
166 mice, tumor burden in representative mice indicated by 'circle' symbol in Fig. 6c, were  
167 compared via bioluminescent imaging, IVIS imaging, and H&E staining of formalin-  
168 fixed pancreas isolated after euthanasia. For bioluminescent imaging, isoflurane was  
169 used for anesthesia. (b) Total flux (p/s) as measured by bioluminescent imaging on day  
170 26 after tumor implantation was plotted with respect to the weight of the isolated  
171 pancreas after euthanasia. Data points are color-coded to represent mice in different  
172 treatment groups with n=9, 10, 8, and 11 in scrambled+IgG, ANT008+IgG,  
173 scrambled+anti-PD-1, and ANT008+anti-PD-1, respectively. (c) Trichrome staining  
174 showing blue collagen stains in the tissue for orthotopically implanted KPC-Luc tumors  
175 in all treatment groups. Representative images for scrambled+IgG, ANT008+IgG,  
176 scrambled+anti-PD-1 shown; ANT008+anti-PD-1 shown in Figure 6e. Experiments on  
177 c were performed once with samples from multiple mice. XY plot showing the  
178 correlation, summarized as R-squared, between number of (d) CD4+ or (e) CD8+ T  
179 cells/mm<sup>2</sup>; and (f) Ki67+ CD4+ or (g) Ki67+ CD8+ T cells/mm<sup>2</sup> with weight of the  
180 pancreas with n=4 to 6 mice per group.

181  
182

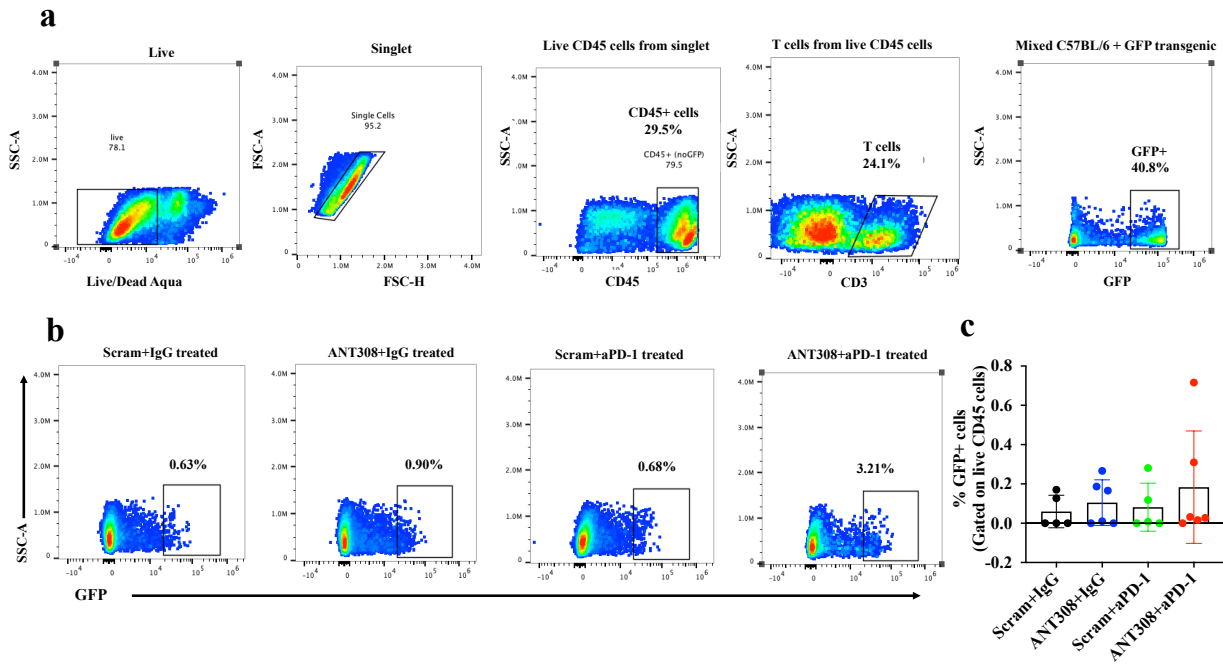

184

185

186

187

188

189

190

191

192

193

194

195

196

197

198

199

200

201

202

203

**Supplementary Fig. 9. Increased frequency of GFP+ T cells in tumors of mice treated with the combination of VIP-R antagonist and anti-PD-1 as confirmed by flow cytometry.** (a) Singlets from single-cell suspensions prepared from tumors of mice from Fig. 7a were gated by plotting forward scatter area (FSC-A) versus forward scatter height (FSC-H). Live CD45+ cells were gated by selecting CD45 positive, followed by gating for CD3 positive cells in CD3 versus SSC-A plots. GFP+ cells were then selected by gating GFP-positive cells based on mixed population of unstained splenocytes from naïve C57BL/6 mice and spleen samples from GFP transgenic mice. (b) Representative plot for CD3+GFP+ cells for four treatment groups (Scram+IgG, ANT308+IgG, Scram+anti-PD1, ANT308+ant-PD1) (c) Summary data from b showing percentage of GFP+ T cells over live CD45+ T cells (n=5 or 6 biologically independent samples). Percent GFP+ T cells were computed as the percentage of total CD3+GFP+ events divided by total live CD45+ events enumerated from FlowJo. Error bars show mean  $\pm$  Standard deviation.

204  
205  
206  
207  
208

## Supplementary Tables

**Supplementary Table 1. Table depicting demographics of PDAC patients tested for serum VIP levels.**

| Patient # | Age | Gender | Race             | Ethnicity    |
|-----------|-----|--------|------------------|--------------|
| 1         | 71  | Female | Caucasian        | Non-Hispanic |
| 2         | 66  | Male   | Caucasian        | Non-Hispanic |
| 3         | 61  | Female | African American | Non-Hispanic |
| 4         | 75  | Male   | Caucasian        | Hispanic     |
| 5         | 73  | Male   | Caucasian        | Non-Hispanic |
| 6         | 76  | Male   | Caucasian        | Non-Hispanic |
| 7         | 59  | Female | Caucasian        | Non-Hispanic |
| 8         | 47  | Female | African American | Non-Hispanic |
| 9         | 69  | Male   | Caucasian        | Non-Hispanic |
| 10        | 69  | Male   | Caucasian        | Non-Hispanic |
| 11        | 64  | Male   | African American | Non-Hispanic |
| 12        | 71  | Female | Caucasian        | Non-Hispanic |
| 13        | 59  | Female | African American | Non-Hispanic |
| 14        | 69  | Female | Caucasian        | Non-Hispanic |
| 15        | 71  | Female | Caucasian        | Non-Hispanic |
| 16        | 67  | Male   | Caucasian        | Non-Hispanic |
| 17        | 69  | Male   | Caucasian        | Non-Hispanic |
| 18        | 52  | Male   | African American | Non-Hispanic |
| 19        | 63  | Male   | Caucasian        | Non-Hispanic |

209  
210  
211  
212  
213  
214  
215  
216  
217  
218  
219  
220  
221  
222  
223  
224  
225  
226  
227  
228  
229  
230  
231

232  
233  
234

**Supplementary Table 2. Details of fluorescent conjugated antibodies used in this study. (Abbreviations: Ag, antigen; CD, cluster of differentiation)**

| Target species          | Target (Ag or CD#)           | Fluorochrome    | Clone      | Vender         | Catalog no. | Dilution             |
|-------------------------|------------------------------|-----------------|------------|----------------|-------------|----------------------|
| <b>Human</b>            | CD3                          | PE-CF594        | UCHT1      | BD             | 562280      | 1:50                 |
|                         | CD4                          | APC-Cy7         | RPA-T4     | BD             | 557871      | 1:50                 |
|                         | CD8                          | Alexa Fluor 700 | RPA-T8     | BD             | 561453      | 1:50                 |
|                         | CD69                         | BV650           | FN50       | Biolegend      | 3190934     | 1:50                 |
|                         | CXCR4                        | PE-eFluor 610   | 12G5       | eBioscience    | 610-9999-42 | 1:50                 |
|                         | PD-1                         | FITC            | EH12.2H7   | Biolegend      | 329904      | 1:50                 |
|                         | Tim-3                        | PE-Cy7          | 7D3        | BD             | 345014      | 1:50                 |
|                         | Lag-3                        | APC             | 7H2C65     | Biolegend      | 369212      | 1:50                 |
|                         | CD25                         | BV650           | 2A3        | BD             | 562661      | 1:50                 |
|                         | FoxP3                        | PerCP-Cy5.5     | 236A/E7    | BD             | 561493      | 1:30                 |
| <b>Mouse</b>            | CD45                         | BV480           | 30-F11     | BD             | 566095      | 1:50                 |
|                         | CD3                          | FITC            | 17A2       | BD             | 561798      | 1:50                 |
|                         | CD4                          | Alexa Fluor 700 | RM4-5      | BD             | 557956      | 1:50                 |
|                         | CD8                          | PerCP-Cy5.5     | 53-6.7     | BD             | 551162      | 1:50                 |
|                         | Ki67                         | PE-Cy7          | 16A8       | Biolegend      | 652426      | 1:30                 |
|                         | CD25                         | APC-Cy7         | 3C7        | Biolegend      | 101918      | 1:50                 |
|                         | FoxP3                        | PE              | FJK16s     | eBioscience    | 12-5773-82  | 1:30                 |
|                         | PD-1                         | BV785           | 29F,1A12   | Biolegend      | 135225      | 1:50                 |
|                         | Tim-3                        | PE              | B8.2C12    | Biolegend      | 134004      | 1:50                 |
|                         | CXCR4                        | PE-CF594        | 2B11       | BD             | 565019      | 1:50                 |
|                         | IFNg                         | FITC            | XMG12      | Biolegend      | 505806      | 1:30                 |
|                         | IL4                          | PE-Cy7          | 11B11      | Biolegend      | 504118      | 1:30                 |
|                         | H-2Kb<br>MuLV<br>p15E        | APC             |            | MBL            |             |                      |
|                         |                              |                 |            |                | TB-M507-2   | 1:10                 |
| <b>In vivo MAb</b>      | PD-1                         |                 | RMP1-14    | BioXcell       | BE0146      | 200µg (X4)           |
|                         | Rat IgG2A<br>Isotype control |                 | 2A3        | BioXcell       | BE0089      | 200µg (X4)           |
|                         | CD4                          |                 | GK1.5      | BioXcell       | BE0003-1    | 200µg (X5)           |
|                         | CD8                          |                 | Clone 2.43 | BioXcell       | BE0061      | 200µg (X5)           |
| <b>Other Antibodies</b> | P-CREB (S133)                | Alexa(R) 647    | 87G3       | Cell Signaling | 14001S      | 1:50                 |
|                         | VPAC1                        |                 | SP234      | Sigma          | SAB5500193  | 1:500 (Western Blot) |
|                         | VPAC2                        |                 | SP235      | Sigma          | SAB5500194  | 1:500 (Western Blot) |



|                       |         |                |          |                            |
|-----------------------|---------|----------------|----------|----------------------------|
| PD1                   | D4W2J   | Cell Signaling | 86163S   | 1:1000(Western Blot)       |
| CTLA4                 | E1V6T   | Cell Signaling | 96399S   | 1:500 (Western Blot)       |
| VIP                   | OTI5B5  | Origene        | CF806852 | 1:50 (Immunofluorescence)  |
| Cytokeratin 19 (CK19) | EP1580Y | Abcam          | ab52625  | 1:400 (Immunofluorescence) |
| CD4                   | EPR6855 | Abcam          | ab133616 | mIHC                       |
| CD8                   | EP1150Y | Abcam          | ab93278  | mIHC                       |
| Ki67                  | SP6     | Abcam          | ab16667  | mIHC                       |

235  
236  
237  
238  
239  
240  
241  
242  
243  
244  
245  
246  
247  
248  
249  
250  
251  
252  
253  
254  
255  
256  
257  
258  
259  
260  
261  
262  
263

264 **Supplementary Table 3. Statistical analysis showing synergistic effect between**  
 265 **VIP-R antagonist and aPD-1 in orthotopic KPC-Luc model.**  
 266  
 267

| Fractional total flux (FTF) relative to untreated controls <sup>a</sup> |                      |                 |                       |          |                                                 |
|-------------------------------------------------------------------------|----------------------|-----------------|-----------------------|----------|-------------------------------------------------|
| a                                                                       | VIP-R antagonist+IgG | Scrambled+aPD-1 | Combination treatment |          | Ratio of expected FTF/observed <sup>d</sup> FTF |
|                                                                         |                      |                 | Expected <sup>c</sup> | Observed |                                                 |
| 15                                                                      | 0.523                | 1.267           | 0.663                 | 0.571    | 1.161                                           |
| 19                                                                      | 0.240                | 0.866           | 0.208                 | 0.167    | 1.242                                           |
| 22                                                                      | 0.564                | 0.679           | 0.383                 | 0.181    | 2.117                                           |

268

269 <sup>a</sup> FTF (mean tumor flux experimental)/(mean tumor flux scrambled+IgG)

270 <sup>b</sup> Day after tumor implantation

271 <sup>c</sup> (mean FTF of VIP-R antagonist+IgG) x (mean FTF of scrambled+aPD-1)

272 <sup>d</sup> Obtained by dividing the expected FTF by the observed FTF. A ratio of >1 indicates  
 273 a synergistic effect, and a ratio <1 indicates a less than additive effect  
 274  
 275  
 276  
 277

278 **Supplementary Methods**

279

280 *Sanger Sequencing*

281 CRISPR-Cas9 VIPR2-KO panc02 cell pool was generated by Synthego (Redwood  
282 City, CA) with a confirmed efficiency of 98%. Guide sequence  
283 (UACCUCUCUGAUUCUCCGUU) was designed to target exon 2 of *VIPR2*. Single  
284 clones were selected with serial dilution in 96 well plates. After the colony was  
285 formed, DNA was extracted from single clone cell pellets using the QIAamp DNA Mini  
286 Kit from Qiagen (Cat# 51304). PCR was conducted using the following primers to  
287 amplify the region around gRNA: F: TTAGAAAGGTGAAGCGTTGGA (0.5  $\mu$ M), R:  
288 TTTGCTGAAATCCCCACTGT (0.5  $\mu$ M). The PCR reaction was performed with  
289 Promega GoTaq® Master Mixes (Cat# M7122) as follows: Hot start at 95 °C for 5min,  
290 denaturation at 95°C for 30s, annealing at 58°C for 45s, and extending at 72°C for  
291 45s. The reaction was finished with an extra 5-min elongation at 72°C and a 20-min  
292 period at 4°C. The amplicon at 500bp was purified with a QIAquick Gel Extraction kit  
293 from Qiagen (Cat# 28704) and Sanger Sequencing was conducted at  
294 Genewiz/Azenta. Results were analyzed on. Clones with a model fit score of 1 and a  
295 knockout (KO) score of 100 were selected for further experiments.

296

297 *RT-PCR*

298 Total RNA was isolated with Trizol reagent (Thermo Fisher Scientific) and the first-  
299 strand cDNA was prepared using an AMV RNA PCR kit (TaKaRa) from 1 mg total  
300 RNA. PCR amplification for VPAC2 mRNA detection was carried out with an initial  
301 denaturing step at 95C for 5 min, then 35 cycles of PCR (95C for 30 s, 60C for 45 s,  
302 and 72C for 45 s) and a further extension at 72C for 10 min. The PCR products  
303 (Promega) and 50bp ladder (Thermo Fisher) were loaded on 4% of agarose gel and  
304 underwent electrophoresis in TBE buffer. UV system was applied for imaging.

305

306 *Primers*

307 GAPDH Forward AGGAGAGTGTTCCTCGTCCC Reverse  
308 CAGATCCACGACGGACACAT  
309 VPAC2 Forward ATGGACAGCAACTCGCCTCTCTTTAG Reverse  
310 GGAAGGAACCAACACATAACTCAAACAG

311

312

313

314

315

316

317

318

319

320

321

322

323 **Supplementary References**

324

325 1. Ward, J.M., M.J. Collins, Jr., and J.C. Parker, Naturally occurring mouse  
326 hepatitis virus infection in the nude mouse. *Lab. Anim. Sci.* **27**, 372-376 (1977).

327 2. Ward, J.M., et al., Chronic Active Hepatitis and Associated Liver-Tumors in Mice  
328 Caused by a Persistent Bacterial-Infection with a Novel Helicobacter Species. *Jnci-*  
329 *Journal of the National Cancer Institute* **86**,1222-1227 (1994).

330
